# Supplementary material for: Nano-tungsten carbide decorated graphene as co-catalysts for enhanced hydrogen evolution on molybdenum disulfide
Source: Royal Society of Chemistry journal article supplement (doi:10.1039/c3cc41031e), 2013-01-01
Supplement: c3cc41031e.pdf [file c3cc41031e.pdf]

# Electronic Supplementary Information

## **Nano-Tungsten Carbide Decorated Graphene as Co-catalyst for Enhanced Hydrogen Evolution on Molybdenum Disulfide**

*Ya Yan,<sup>a</sup> Baoyu Xia,<sup>a</sup> Xiaoying Qi,<sup>c</sup> Haibo Wang,<sup>a</sup> Rong Xu,<sup>a</sup>  
Jing-Yuan Wang,<sup>b</sup> Hua Zhang,<sup>c</sup> and Xin Wang\*<sup>a</sup>*

<sup>a</sup> School of Chemical and Biomedical Engineering, Nanyang Technological University, 50 Nanyang Avenue, 639798, Singapore. Fax: +65 67947553; E-mail: [WangXin@ntu.edu.sg](mailto:WangXin@ntu.edu.sg)

<sup>b</sup> Residues and Resource Reclamation Centre, Nanyang Technological University

<sup>c</sup> School of Materials Science and Engineering, Nanyang Technological University

### **Experimental details**

*Synthesis of nano-WC:* For a typical synthesis of nano-WC, a certain amount (50-80 mg) of as-prepared WO<sub>3</sub> nanorods as mentioned in our previous paper<sup>1</sup> was transferred into a tube furnace for reduction-carburization. The whole system was first purged with argon gas to completely remove any air before heating. The argon gas

was then switched off and a mixture of CH<sub>4</sub> (20 mL min<sup>-1</sup>) and H<sub>2</sub> (80 mL min<sup>-1</sup>) was fed to the furnace. In the meantime, the furnace was first heated to 600 °C with a ramp rate of 5 °C min<sup>-1</sup> and then to 800 °C at a rate of 2 °C min<sup>-1</sup> and kept at this temperature for 3h. After that, the furnace was cooled down to a temperature of 700 °C. The supply of the carburizing agent was switched off and argon was used to purge the furnace again. The furnace was further cooled down to room temperature.

*Synthesis of Graphene oxide (GO):* Graphene oxide (GO) was synthesized from natural graphite powder by a modified Hummers' method.

*Synthesis of the nano-WC/GO hybrids:* Hybrid of WC/GO was obtained by adding as-prepared nano-WC to GO dispersed in 15 mL of Dimethylformamide (DMF) /H<sub>2</sub>O (10:1) mixture. The mixture was sonicated in ice water bath for accumulated 30 min in a program of 1s on 1s off and then stirred at room temperature overnight. In order to investigate the effect of WC content in the WC/GO hybrid co-catalyst on the electrocatalytic hydrogen evolution activity of MoS<sub>2</sub>, the weight percentages of WC to GO were varied from 0 to 100 (0, 20, 25, 33.3 and 100 wt%) by varying the weight of nano-WC, the resulting samples were labeled as *x*W(100-*x*)G, where W and G refer to WC and graphene, respectively, and *x* = 0, 20, 25, 33.3 and 100, respectively.

*Synthesis of layered-MoS<sub>2</sub>/WC/RGO composite:* The composite samples were synthesized by a solvothermal method. (NH<sub>4</sub>)<sub>2</sub>MoS<sub>4</sub> was used as the MoS<sub>2</sub> source and was added to the 15 mL thoroughly mixed WC/GO hybrid GO. The mixture was sonicated at room temperature for approximately 20 min until a clear and

homogeneous solution was achieved. Then, 0.2 ml of  $\text{N}_2\text{H}_4 \cdot \text{H}_2\text{O}$  was added and this obtained solution mixture was further sonicated for 10 min before transferred to a 50 mL Teflon-lined autoclave with a Teflon liner and kept at 210 °C for 18 h. The resulting precipitate was collected, washed thoroughly with distilled water followed by a rinse in ethanol, and then dried at 60 °C for 12 h. Similarly, a series of the  $\text{MoS}_2/\text{WC}/\text{RGO}$  composites were prepared by using the  $x\text{W}(100-x)\text{G}$  as co-catalyst under the same conditions but replacing 25W75G with  $x\text{W}(100-x)\text{G}$ . Blank  $\text{MoS}_2$  was also prepared following the same procedure as above except for the first addition of WC/GO hybrid co-catalyst. The detailed data are listed in Table S1. Moreover, in order to further investigate the content effect of the WC/RGO (25W75G) co-catalyst on the electrocatalytic hydrogen evolution activity of  $\text{MoS}_2$ , the weight ratio of 25W75G/ $\text{MoS}_2$  was changed from 15wt % to 50wt % by varying the amount of 25W75G (see Table S2). For the purpose of comparison, 30%-25W75G/ $\text{MoS}_2$  mixture was prepared by simple mechanical mixing of the pristine  $\text{MoS}_2$  and 30 wt% of 25W75G without the solvothermal process.

*Characterization:* All transmission electron microscopy (TEM), high-resolution (HR)TEM images and element mapping were taken from JEOL JEM 2100F, while the field emission scanning electron microscopy (FESEM) images and energy-dispersive X-ray spectroscopy (EDX) spectra were taken on a JEOL JSM 6700F. XRD analysis of different samples was carried out on a X-ray diffractometer (Bruker AXS D8, Cu  $\text{K}\lambda$ ,  $\lambda = 1.5406 \text{ \AA}$ , 40 kV and 20 mA). Raman spectra were collected via a Renishaw Ramanscope in the backscattering configuration using 514

nm (2.41 eV) laser wavelengths over five random spots on the powers. X-ray photoelectron spectroscopy (XPS) spectrum was measured on a VG Escalab 250 spectrometer equipped with an Al anode (Al K $\alpha$  = 1846.6 eV). The specific surface area and pore size distribution of the samples were evaluated in Autolab-6B (Quantachrome Instruments) using the liquid nitrogen adsorption/desorption method. All the samples were degassed at 120 °C for 2 hours before the measurements. The BET surface area was determined using adsorption data in the relative pressure ( $P/P_0$ ) range of 0.05-0.25. The desorption branch was used to determine the pore size distribution *via* the Barret-Joyner-Halender (BJH) method. The nitrogen adsorption volume at the relative pressure ( $P/P_0$ ) of 0.95 was used to determine the single-point pore volume and the average pore size. Thermo gravimetric analysis (TGA) and the derived differential thermogravimetric (DTA) experiments were conducted on a PerkinElmer Diamond TG/DTA equipment. The sample was first kept at 100 °C for 30 min to remove moisture and then was heated up to 1000 °C under high purity air flow (50 sccm) in a ramp of 10 °C/min while its weight was monitored. Atomic force microscope (AFM) with a MPF3D microscope from Asylum Research was used in this paper.

*Electrochemical measurements:* All electrochemical measurements were conducted on an Autolab PGSTAT302 potentiostat (Eco Chemie, Netherlands) in a three-electrode cell at room temperature. A Pt foil (4.0 cm<sup>2</sup>) and a saturated calomel electrode (SCE) were used as counter and reference electrodes, respectively. The working electrode was prepared on a glass carbon (GC) disk as the substrate.

Typically, a mixture containing 2.0 mg catalyst, 2.5 mL ethanol and 0.5 mL Nafion solution (0.05 wt%, Gashub) was ultrasonicated for 15 min to obtain a well-dispersed ink. Then 20  $\mu\text{L}$  of the catalyst ink (containing 13  $\mu\text{g}$  of catalyst) was loaded onto a glassy carbon electrode of 4 mm in diameter (loading  $\sim 0.104 \text{ mg/cm}^2$ ). The presented current density refers to the geometric surface area of the glass carbon electrode. Linear sweep voltammetry with scan rate of  $5 \text{ mV s}^{-1}$  was conducted in  $0.5 \text{ M H}_2\text{SO}_4$ . The working electrodes were mounted at a rotating disc electrode with a rotating rate of 1000 rpm during the test. In all experiments, the electrolyte solutions were purged with  $\text{N}_2$  for 15 min prior to the experiments in order to remove oxygen. During the measurements, the headspace of the electrochemical cell was continuously purged with  $\text{N}_2$ . AC impedance measurements were carried out in the same configuration at  $\eta = 0.15 \text{ V}$  from  $10^5$ - $0.02 \text{ Hz}$  with an AC voltage of 5 mV. Commercial Pt/C (20 wt %) from E-TEK was measured as received. All the potentials reported in our manuscript were referenced to a reversible hydrogen electrode (RHE) by adding a value of  $(0.241 + 0.059 \text{ pH}) \text{ V}$ .

**Table S1.** Effects of WC/RGO co-catalyst content in the MoS<sub>2</sub>/WC/RGO electrocatalysts on the HER activity according to polarization measurements.

| Sample[a]   | Composition                    | Tafel slope<br>[mV / decade][b] | Onset potential [V] [c] |
|-------------|--------------------------------|---------------------------------|-------------------------|
| 100M/0(W-G) | 100MoS <sub>2</sub> +0(WC/RGO) | 106                             | -0.14                   |
| 85M/15(W-G) | 85MoS <sub>2</sub> +15(WC/RGO) | 74                              | -0.13                   |
| 80M/20(W-G) | 80MoS <sub>2</sub> +20(WC/RGO) | 78                              | -0.13                   |
| 70M/30(W-G) | 70MoS <sub>2</sub> +30(WC/RGO) | 41                              | -0.11                   |
| 60M/40(W-G) | 60MoS <sub>2</sub> +40(WC/RGO) | 60                              | -0.15                   |
| 50M/50(W-G) | 50MoS <sub>2</sub> +50(WC/RGO) | 51                              | -0.16                   |

[a] W-G samples contains 25%WC and 75% of RGO in the co-catalyst.

[b] Calculated from the linear portion of the plot in the potential range of 150 mV-200 mV.

[c] The onset potential at which the hydrogen evolution occurred measured versus RHE.

**Table S2.** Effects of WC/RGO weight ratio on the HER activity according to polarization measurements.

| Sample[a]     | Composition                      | Tafel slop<br>[mV / decade][b] | Onset potential [V] [c] |
|---------------|----------------------------------|--------------------------------|-------------------------|
| M/0W-100G     | MoS <sub>2</sub> +RGO            | 47                             | -0.13                   |
| M/33.3W-66.7G | MoS <sub>2</sub> +33.3WC-66.7RGO | 47                             | -0.12                   |
| M/25W-75G     | MoS <sub>2</sub> +25WC-75RGO     | 41                             | -0.11                   |
| M/20W-80G     | MoS <sub>2</sub> +20WC-80RGO     | 45                             | -0.13                   |
| M/100W-0G     | MoS <sub>2</sub> +WC             | 54                             | -0.12                   |

[a] All composite samples contain 70% of MoS<sub>2</sub> and 30% of co-catalyst in the composite electrocatalyst.

[b] Calculated from the linear portion of the plot in the potential range of 150 mV-200 mV.

[c] The onset potential at which the hydrogen evolution occurred measured versus RHE.

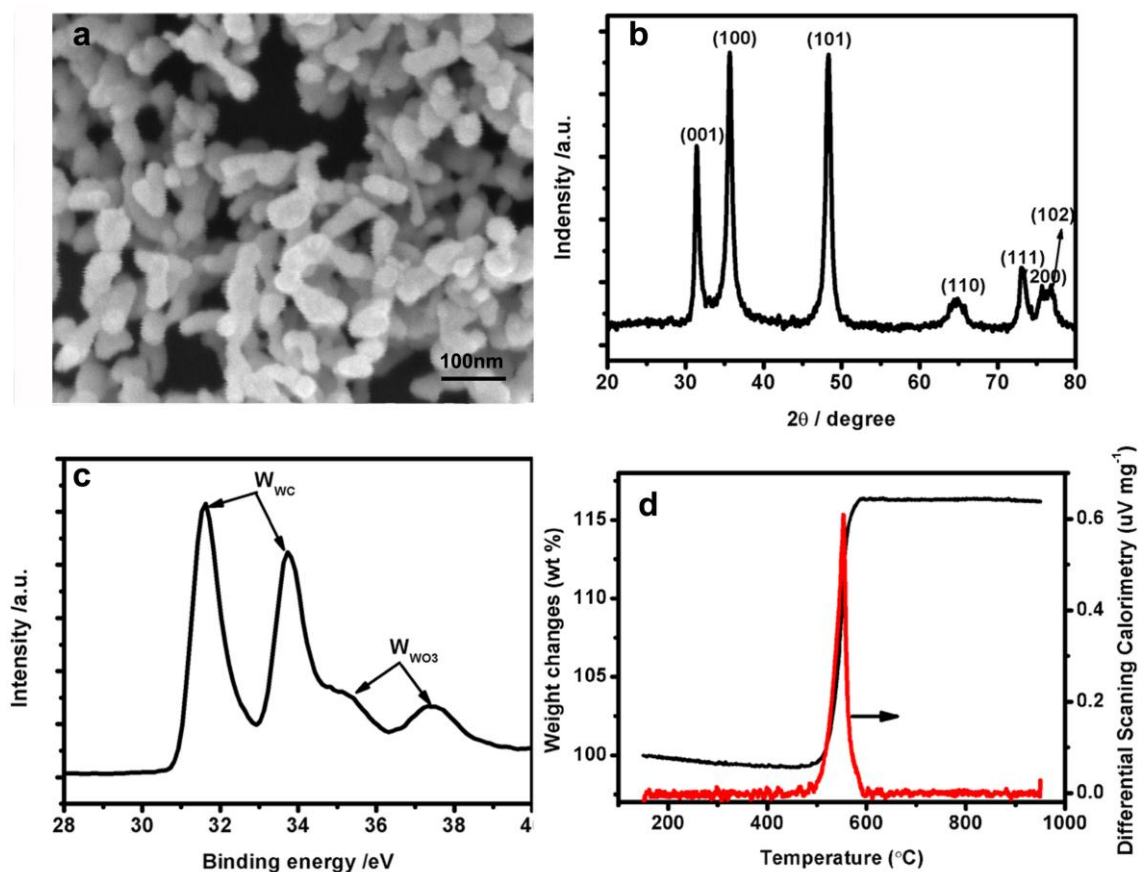

**Figure S1.** FESEM images (a), XRD pattern (b), XPS W4f spectra (c) and TGA-DSC (d) of the nano-WC obtained in the  $\text{CH}_4/\text{H}_2$  mixtures at 800 °C for 3h.

The as-prepared WC nanoparticles exhibits an interesting string-like morphology with average size of 35 nm. XRD pattern demonstrated the material was a hexagonal WC (PDF # 25-1047). From XPS spectrum, the  $\text{W}4f_{7/2}$  and the  $\text{W}4f_{5/2}$  peaks corresponding to the binding energy of 31.6 and 33.7 eV are assigned to the tungsten carbide.<sup>2</sup> It also demonstrates the oxygen-modified W on the particle's surface at 35.7 and 37.2 eV which could come from the thin  $\text{WO}_x$  film that was formed in air at nanometer level, which is hardly detectable by XRD.<sup>3</sup> TG analysis of the nano-WC under air shows that there is a very slight weight loss (~0.5%) during the heating range of 150-500°C, which could be from undesirable amorphous carbon. Beyond

this temperature range, an obvious weight increase caused by the oxidation of WC is observed from 500-600°C, which is consistent with the reported fact that oxidation of WC starts at 500–600 °C.<sup>4</sup> The above results could indicate the relatively high purity of the nano-WC precursor.

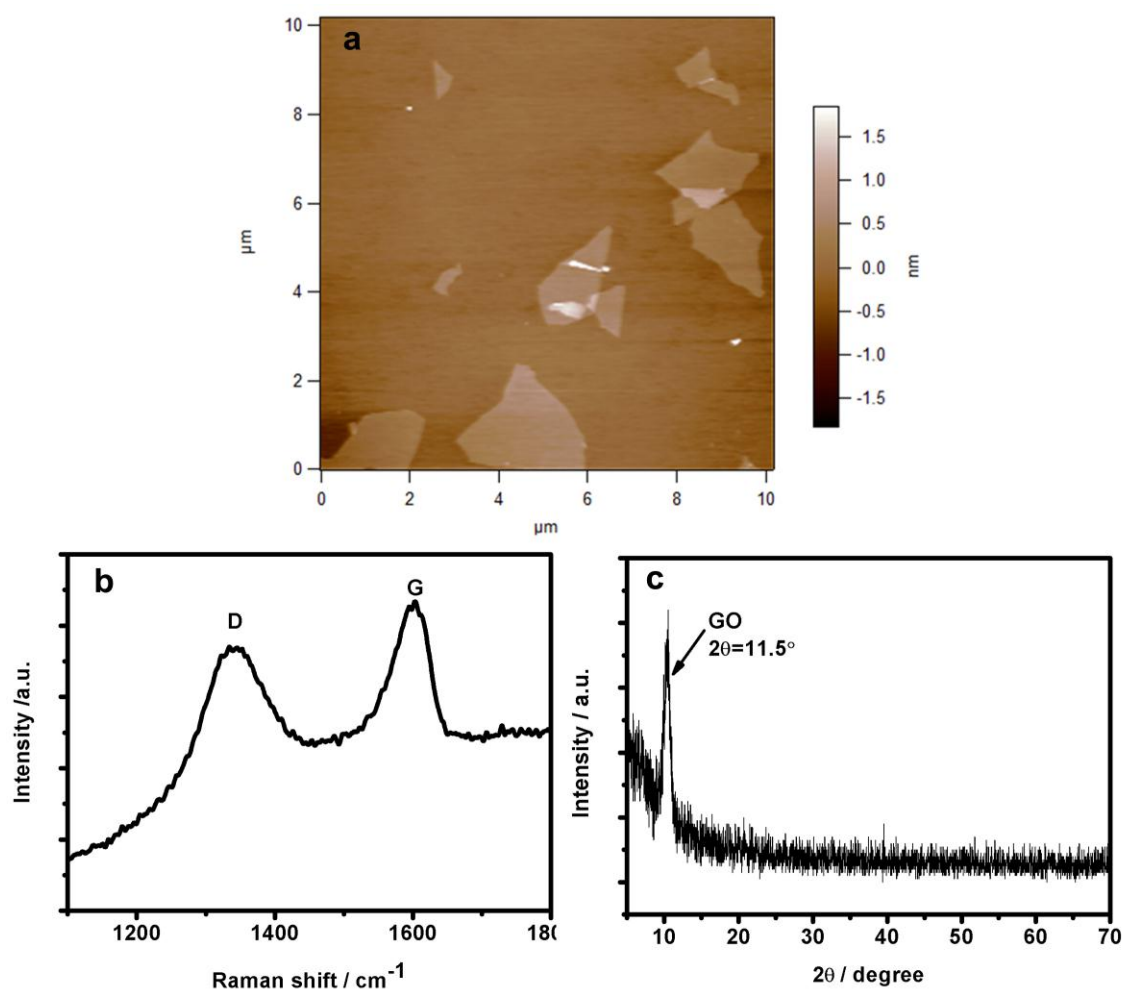

**Figure S2.** AFM image (a), Raman spectrum (b) and XRD pattern (c) of the prepared graphene oxide sheets as starting material.



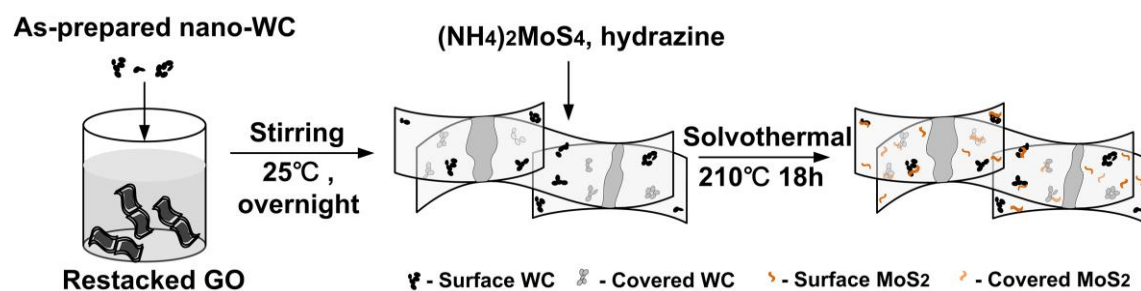

**Figure S3.** Schematic illustration of the synthesis of MoS<sub>2</sub>/WC/RGO composite.

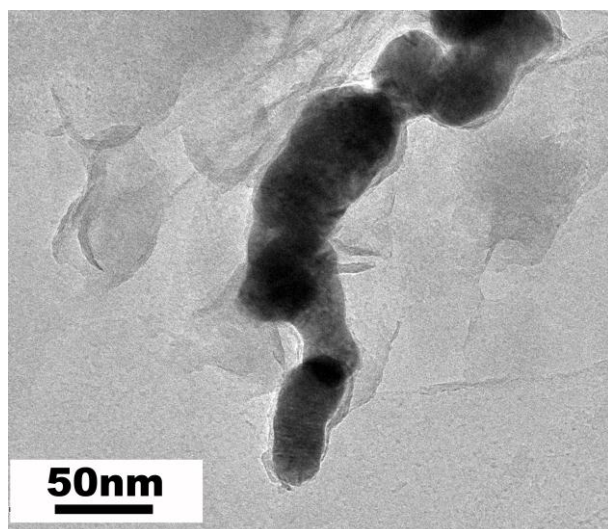

**Figure S4.** TEM image of the selected area of the MoS<sub>2</sub>/WC/RGO composite for element mapping.

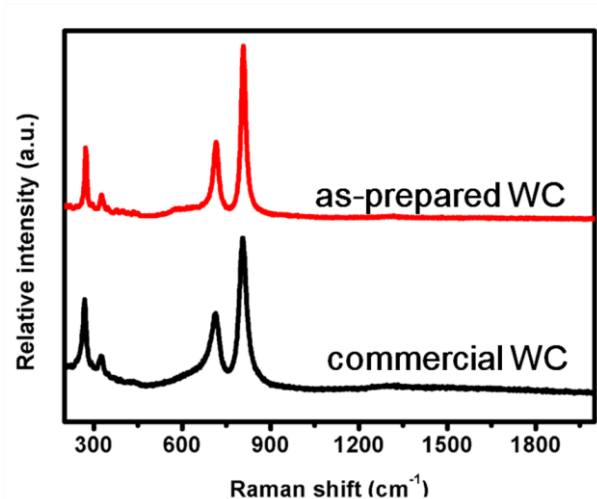

**Figure S5.** Raman spectra of self-prepared WC and commercial WC. The characteristic peaks of the as-prepared WC are consistent with the commercial one.

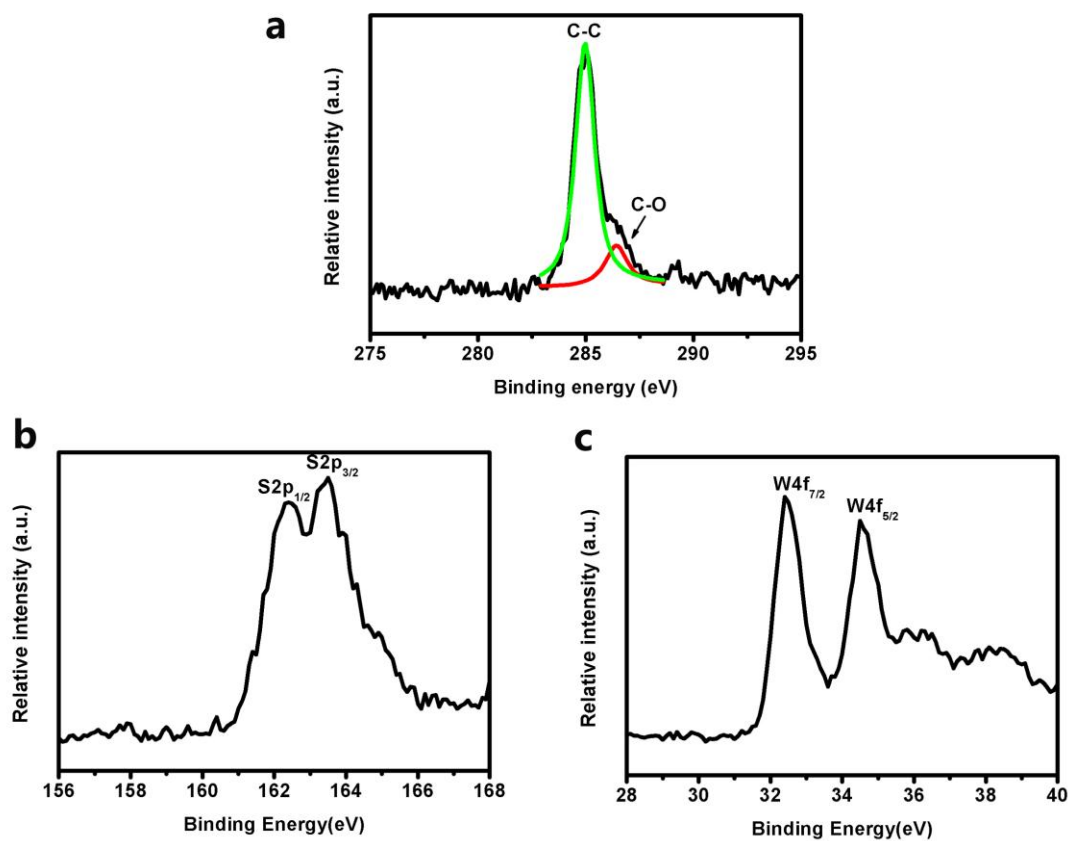

**Figure S6.** High-resolution XPS spectra of MoS<sub>2</sub>/WC/RGO composites. (a) C 1s, (b) S 2p and (c) W 4f spectrum.

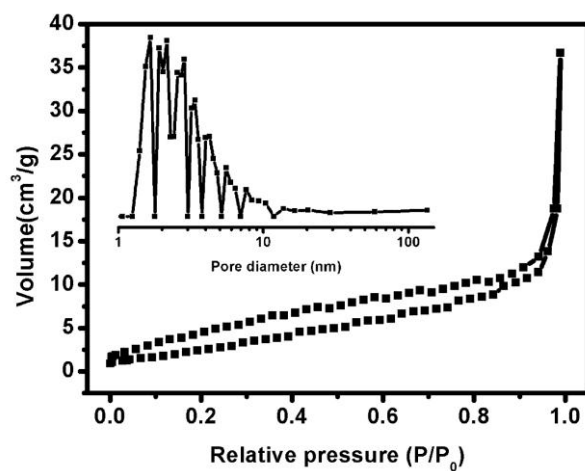

**Figure S7.** N<sub>2</sub> adsorption/desorption isotherms and the corresponding BJH pore-size distribution (inset) of nano-WC. The pore diameter distribution was determined from the desorption branch.

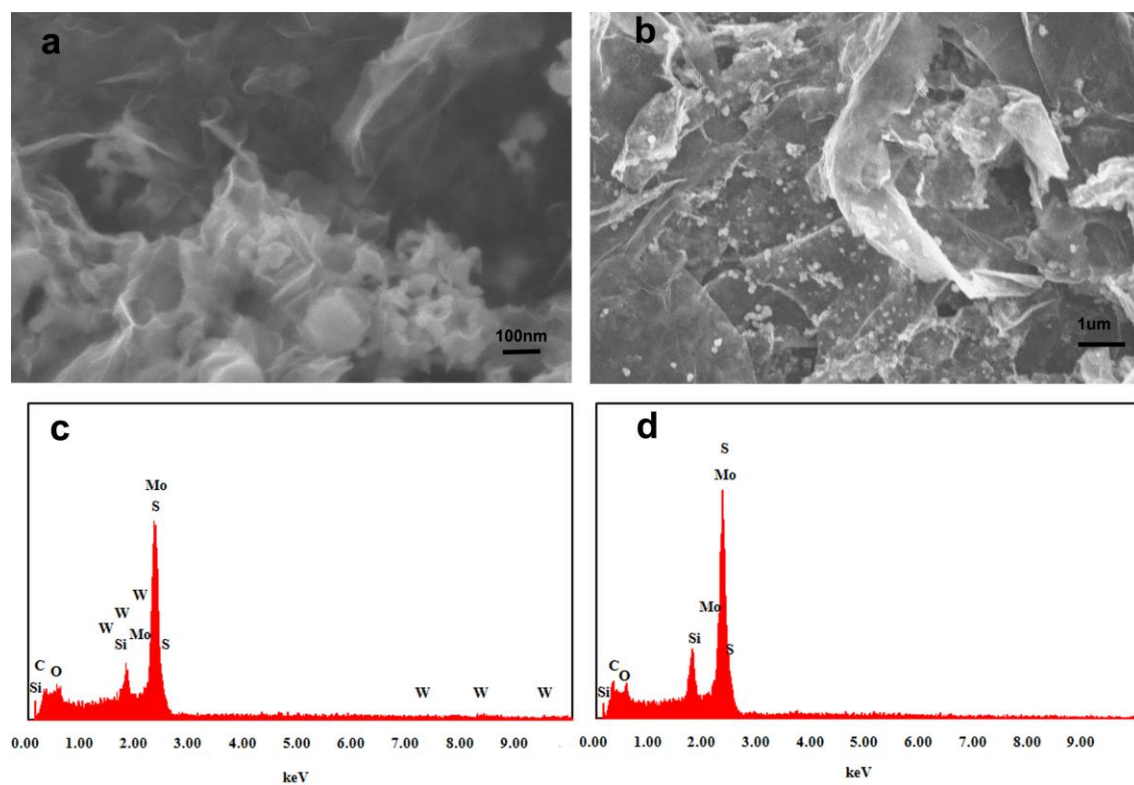

**Figure S8.** FESEM images and EDS spectra of MoS<sub>2</sub>/WC/RGO composites (70M/30(W-G)) (a, c) and MoS<sub>2</sub>/RGO hybrid (70M/30G) (b, d), respectively.

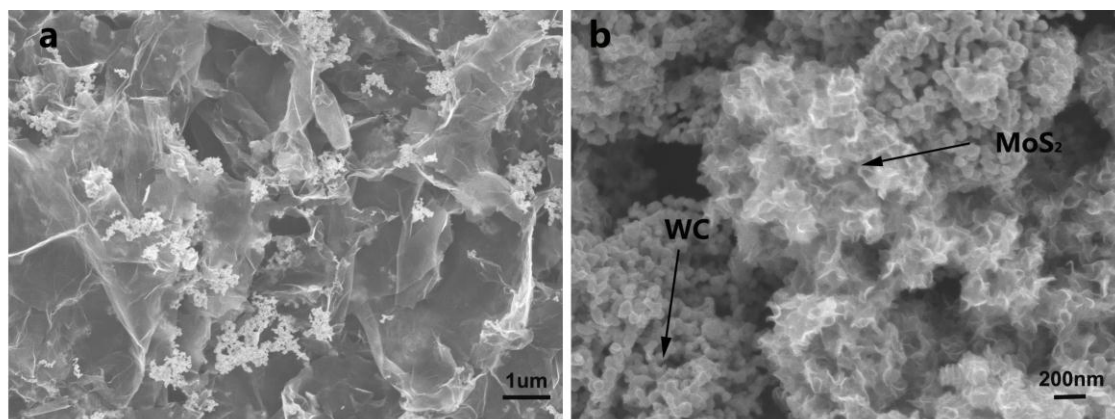

**Figure S9.** FESEM images of (a) nano-WC/RGO, (b) MoS<sub>2</sub>/nano-WC hybrid.

Control experiment was also conducted in the absence of RGO by following the exactly same procedure, which resulted in the aggregation of MoS<sub>2</sub> particles and WC particles in separate regions (Figure S9b) and low activities and low activities.

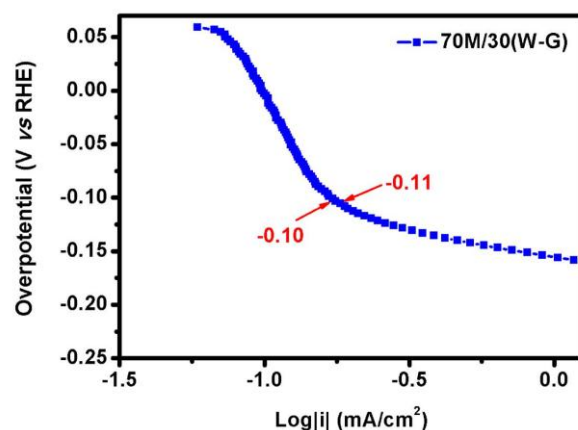

**Figure S10.** The Tafel plot of 70M/30(W-G) in the region of low current densities.

The onset potential for HER was read from the semi-log (Tafel) plot. For example, the semi-log plot of 70M/30(W-G) in the region of low current densities as displayed in Fig.S8 shows a linear relationship below -0.11V but starts to deviate above -0.10V. Therefore, -0.11 was chosen as the onset potential for 70M/30(W-G). The same method was applied on determining the overpotential for other samples.<sup>5</sup>



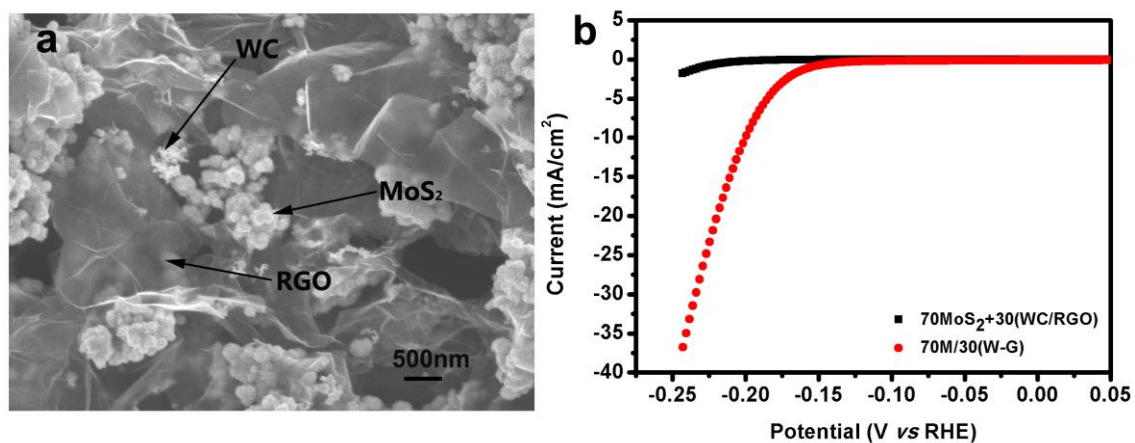

**Figure S11.** (a) FESEM image of the MoS<sub>2</sub> (70%) particles physically mixed with WC/RGO (30%) and (b) the corresponding polarization curve.

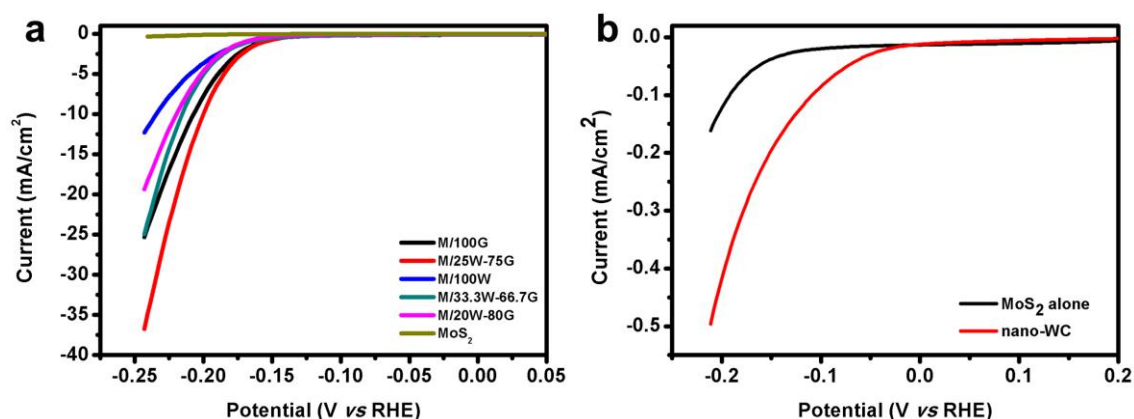

**Figure S12.** Polarization curve of (a) MoS<sub>2</sub>/WC/RGO composites with different WC/RGO ratio in the WC/RGO co-catalyst and (b) nano-WC (MoS<sub>2</sub> was used as a reference).

#### References

- 1 Y. Yan, L. Zhang, X. Qi, H. Song, J.-Y. Wang, H. Zhang, X. Wang, *Small* 2012, **8**, 3350.
- 2 M. C. Weidman, D. V. Esposito, I. J. Hsu, J. G. Chen, *J. Electrochem. Soc.* 2010, **157**, F179.
- 3 P. N. Ross Jr, P. Stonehart, *J. Catal.* 1977, **48**, 42.
- 4 Z. Wu, Y. Yang, D. Gu, Q. Li, D. Feng, Z. Chen, B. Tu, P. A. Webley, D. Zhao, *Small* 2009, **5**, 2738.
- 5 W.-F. Chen, K. Sasaki, C. Ma, A. I. Frenkel, N. Marinkovic, J. T. Muckerman, Y. Zhu, R. R. Adzic, *Angew. Chem. Int. Ed.* 2012, **51**, 6131.
